# Supplementary material for: Guidelines on the diagnosis and management of acute pulmonary embolism
Source: Oxford University Press journal article supplement (doi:10.1093/eurheartj/ehn310), 2008-08-30
Supplement: ehn310_Supplementary_Data.zip [file ehn310_Supplementary_Data.zip]

# Guidelines on the diagnosis and management of acute pulmonary embolism

## The Task Force for the Diagnosis and Management of Acute Pulmonary Embolism of the European Society of Cardiology (ESC)

### Supplementary material

**Table A** Major trials reporting RV/LV diameter ratio assessed by CT as a risk marker for 30-day all-cause mortality in acute PE

| Author                                  | n   | CT equipment | Cutoff     | Positive (%) | Sensitivity (%) | Specificity (%) | NPV (%) | PPV (%) |
|-----------------------------------------|-----|--------------|------------|--------------|-----------------|-----------------|---------|---------|
| Van der Meer <i>et al.</i> <sup>1</sup> | 120 | SDCT         | RV/LV >1   | 57.5         | NA              | NA              | 100     | 10      |
| Schoepf <i>et al.</i> <sup>2</sup>      | 431 | 4–16 MDCT    | RV/LV >0.9 | 64           | 78.2            | 38              | 92.3    | 15.6    |

n = number of patients; SDCT = single-detector computed tomography; MDCT = multidetector computed tomography; RV/LV = ratio of diastolic diameters of RV and LV; NA = not available; NPV = negative predictive value; PPV = positive predictive value for all-cause 30-day mortality.

**Table B** Major trials on the prognostic value of BNP/NT-proBNP in acute pulmonary embolism

| Author                                | n   | Biomarker and test used | Threshold                          | Positive (%) | Sensitivity (%) | Specificity (%) | NPV (%) | PPV <sup>a</sup> (%) |
|---------------------------------------|-----|-------------------------|------------------------------------|--------------|-----------------|-----------------|---------|----------------------|
| Ten Wolde <i>et al.</i> <sup>3</sup>  | 110 | BNP <sup>b</sup>        | 21.7 pmol/L                        | 33           | 86              | 73              | 99      | 18                   |
| Kucher <i>et al.</i> <sup>4</sup>     | 73  | NT-proBNP <sup>c</sup>  | 500 pg/mL                          | 58           | NA              | NA              | 100     | 12                   |
| Kucher <i>et al.</i> <sup>5</sup>     | 73  | BNP <sup>d</sup> Triage | 50 pg/mL                           | 58           | NA              | NA              | 100     | 12                   |
| Pruszczyk <i>et al.</i> <sup>6</sup>  | 79  | NT-proBNP <sup>c</sup>  | 600 pg/mL                          | 27           | 100             | 33              | 100     | 26                   |
| Binder <i>et al.</i> <sup>7</sup>     | 124 | NT-proBNP <sup>c</sup>  | 1000 pg/mL                         | 54           | 100             | 49              | 100     | 10                   |
| Kostrubiec <i>et al.</i> <sup>8</sup> | 113 | NT-proBNP <sup>c</sup>  | NT-proBNP >7500 pg/mL <sup>a</sup> | 16           | 65              | 93              | 94      | 61                   |

<sup>a</sup>If not decreasing by 50% within 24 h

<sup>b–d</sup>Tests used: <sup>b</sup>Shionoria, CIS Bio International; <sup>c</sup>Elecsys, Roche Diagnostics; <sup>d</sup>Triage, Biosite Technologies.

n = number of patients; BNP = brain natriuretic peptide; NT-proBNP = N-terminal proBNP; NA = not available; NPV = negative predictive value; PPV = positive predictive value.

**Table C** Major studies on the prognostic value of biochemical markers of myocardial injury in pulmonary embolism

| Author                              | n   | Biomarker and test used | Threshold                           | Positive (%) | Sensitivity (%)                                                 | Specificity (%) | NPV (%) | PPV (%) |
|-------------------------------------|-----|-------------------------|-------------------------------------|--------------|-----------------------------------------------------------------|-----------------|---------|---------|
| Troponins                           |     |                         |                                     |              |                                                                 |                 |         |         |
| Giannitsis et al. <sup>9</sup>      | 56  | cTnT <sup>a</sup>       | 0.10 ng/mL                          | 32           | 89                                                              | 79              | 97      | 44      |
| Konstantinides et al. <sup>10</sup> | 106 | cTnI <sup>b</sup>       | 0.07 ng/mL                          | 41           | 86                                                              | 63              | 98      | 14      |
| Konstantinides et al. <sup>10</sup> | 106 | cTnT <sup>a</sup>       | 0.04 ng/mL                          | 37           | 71                                                              | 66              | 97      | 12      |
| Janata et al. <sup>11</sup>         | 106 | cTnT <sup>a</sup>       | 0.09 ng/mL                          | 11           | 80                                                              | 92              | 99      | 34      |
| Pruszczyk et al. <sup>11</sup>      | 64  | cTnT <sup>a</sup>       | 0.01 ng/mL                          | 50           | 100                                                             | 57              | 100     | 25      |
| Douketis et al. <sup>13</sup>       | 458 | cTnI <sup>c</sup>       | 0.5 ng/mL                           | 13.5         | For all-cause 90-day mortality: odds ratio 3.5, 95% CI 1.0–11.9 |                 |         |         |
| Other markers of injury             |     |                         |                                     |              |                                                                 |                 |         |         |
| Pruszczyk et al. <sup>14</sup>      | 46  | Myoglobin <sup>a</sup>  | 58 ng/mL (women);<br>72 ng/ml (men) | 46           | 100                                                             | 64              | 100     | 33      |
| Kaczynska et al. <sup>15</sup>      | 77  | H-FABP <sup>a</sup>     | 6 ng/mL                             | 39           | Hazard risk 1.03, 95% CI 1.01–1.05, <i>P</i> < 0.0001           |                 |         |         |
|                                     |     |                         |                                     |              | 78                                                              | 66              | 96      | 23      |
| Puls et al. <sup>16</sup>           | 107 | H-FABP <sup>d</sup>     | 6 ng/mL                             | 27           | 100                                                             | 83              | 100     | 37      |

If not specified otherwise, the data refer to in-hospital mortality.

*n* = number of patients; cTnI = cardiac troponin I; cTnT = cardiac troponin T; H-FABP = heart-type fatty acid binding protein; NA = not available; NPV = negative predictive value; PPV = positive predictive value.

<sup>a–d</sup>Tests used: <sup>a</sup>Elecsys, Roche Diagnostics, Mannheim, Germany; <sup>b</sup>Centaur, Bayer, Munich Germany; <sup>c</sup>AxSYM, Abbot, Abbott Park, IL, USA; <sup>d</sup>HyCult Biotechnology, Uden, Netherlands.

**Table D** Prognostic value of concomitant assessment of NT-proBNP and troponin in acute PE

| Author                                 | n                                         | Biomarker/ assay used                      | Threshold                               | Positive (%) | Endpoint                    | Sensitivity (%) | Specificity (%) | NPV (%) | PPV (%) |
|----------------------------------------|-------------------------------------------|--------------------------------------------|-----------------------------------------|--------------|-----------------------------|-----------------|-----------------|---------|---------|
| Kostrubiec <i>et al.</i> <sup>17</sup> | 100 with systolic blood pressure >90 mmHg | NT-proBNP <sup>a</sup> , cTnT <sup>a</sup> | NT-proBNP <600 pg/mL and cTnT <0.07 µ/L | 28           | PE-related 40-day mortality | 0 <sup>b</sup>  | 70              | 89      | 0       |
|                                        |                                           |                                            | NT-proBNP >600 pg/mL and cTnT <0.07 µ/L | 54           | PE-related 40-day mortality | 25              | 44              | 87      | 4       |
|                                        |                                           |                                            | NT-proBNP >600 pg/mL and cTnT >0.07 µ/L | 18           | PE-related 40-day mortality | 75              | 87              | 98      | 33      |

<sup>a</sup>Test used: Elecsys, Roche Diagnostics; Mannheim, Germany.

<sup>b</sup>No death in this group.

*n* = number of patients; NT-proBNP = N-terminal proBNP; cTnT = cardiac troponin T; NPV = negative predictive value; PPV = positive predictive value.

**Table E** Prognostic value of concomitant assessment of echocardiography and troponin measurements in PE

| Author                       | n   | Troponin assay    | Threshold   | Echocardiography              | Endpoint                                                                               | Both tests positive (% of patients) | Parameter                                                |
|------------------------------|-----|-------------------|-------------|-------------------------------|----------------------------------------------------------------------------------------|-------------------------------------|----------------------------------------------------------|
| Kucher et al. <sup>18</sup>  | 91  | cTnI <sup>a</sup> | >0.06 ng/mL | At least moderate RVD         | In-hospital mortality, catecholamines i.v., thrombolysis, CPR, intubation, embolectomy | 26.3                                | Sensitivity 86%<br>Specificity 91%<br>NPV 96%<br>PPV 75% |
| Binder et al. <sup>7</sup>   | 124 | cTnT <sup>b</sup> | ≥0.04 ng/mL | RV >30 mm<br>Parasternal view | In-hospital mortality, catecholamines iv, thrombolysis, CPR, intubation,               | 12.9                                | OR 10.00 (95% CI 2.1–46.8)                               |
| Scridon et al. <sup>19</sup> | 141 | cTnI <sup>c</sup> | ≥0.1 ng/mL  | RV/LV >0.9                    | All-cause 30-day mortality                                                             | 32                                  | OR 7.17 (95% CI 1.6–31.9)                                |

<sup>a–c</sup>Tests used: <sup>a</sup>AxSYM, Abbott, Abbott Park, IL, USA; <sup>b</sup>Elecsys, Roche Diagnostics, Mannheim, Germany; <sup>c</sup>Baxter, Miami, FL, USA.

CI = confidence interval; CPR = cardiopulmonary resuscitation; cTnI = cardiac troponin I; cTnT = cardiac troponin T; LV = left ventricle; n = number of patients; OR = odds ratio; RV = right ventricle; RVD = right ventricular dysfunction.

## References

- van der Meer RW, Pattynama PM, van Strijen MJ, van den Berg-Huijsmans AA, Hartmann IJ, Putter H et al. Right ventricular dysfunction and pulmonary obstruction index at helical CT: prediction of clinical outcome during 3-month follow-up in patients with acute pulmonary embolism. *Radiology* 2005;**235**:798–803.
- Schoepf UJ, Kucher N, Kipfmüller F, Quiroz R, Costello P, Goldhaber SZ. Right ventricular enlargement on chest computed tomography: a predictor of early death in acute pulmonary embolism. *Circulation* 2004;**110**:3276–3280.
- Ten Wolde M, Tulevski II, Mulder JW, Sohne M, Boomsma F, Mulder BJ et al. Brain natriuretic peptide as a predictor of adverse outcome in patients with pulmonary embolism. *Circulation* 2003;**107**:2082–2084.
- Kucher N, Printzen G, Doernhoefer T, Windecker S, Meier B, Hess OM. Low pro-brain natriuretic peptide levels predict benign clinical outcome in acute pulmonary embolism. *Circulation* 2003;**107**:1576–1578.
- Kucher N, Printzen G, Goldhaber SZ. Prognostic role of brain natriuretic peptide in acute pulmonary embolism. *Circulation* 2003;**107**:2545–2547.
- Pruszczyk P, Kostrubiec M, Bochowicz A, Styczynski G, Szulc M, Kurzyna M et al. N-terminal pro-brain natriuretic peptide in patients with acute pulmonary embolism. *Eur Respir J* 2003;**22**:649–653.
- Binder L, Pieske B, Olschewski M, Geibel A, Klostermann B, Reiner C et al. N-terminal pro-brain natriuretic peptide or troponin testing followed by echocardiography for risk stratification of acute pulmonary embolism. *Circulation* 2005;**112**:1573–1579.
- Kostrubiec M, Pruszczyk P, Kaczynska A, Kucher N. Persistent NT-proBNP elevation in acute pulmonary embolism predicts early death. *Clin Chim Acta* 2007;**382**:124–128.
- Giannitsis E, Muller-Bardorff M, Kurowski V, Weidtmann B, Wiegand U, Kampmann M et al. Independent prognostic value of cardiac troponin T in patients with confirmed pulmonary embolism. *Circulation* 2000;**102**:211–217.
- Konstantinides S, Geibel A, Olschewski M, Kasper W, Hruska N, Jackle S et al. Importance of cardiac troponins I and T in risk stratification of patients with acute pulmonary embolism. *Circulation* 2002;**106**:1263–1268.
- Janata K, Holzer M, Laggner AN, Mullner M. Cardiac troponin T in the severity assessment of patients with pulmonary embolism: cohort study. *Br Med J* 2003;**326**:312–313.
- Pruszczyk P, Bochowicz A, Torbicki A, Szulc M, Kurzyna M, Fijalkowska A et al. Cardiac troponin T monitoring identifies high-risk group of normotensive patients with acute pulmonary embolism. *Chest* 2003;**123**:1947–1952.
- Douketis JD, Crowther MA, Stanton EB, Ginsberg JS. Elevated cardiac troponin levels in patients with submassive pulmonary embolism. *Arch Intern Med* 2002;**162**:79–81.
- Pruszczyk P, Bochowicz A, Kostrubiec M, Torbicki A, Szulc M, Gurba H et al. Myoglobin stratifies short-term risk in acute major pulmonary embolism. *Clin Chim Acta* 2003;**338**:53–56.
- Kaczynska A, Pellers MM, Bochowicz A, Kostrubiec M, Glatz JF, Pruszczyk P. Plasma heart-type fatty acid binding protein is superior to troponin and myoglobin for rapid risk stratification in acute pulmonary embolism. *Clin Chim Acta* 2006;**371**:117–123.
- Puls M, Dellas C, Lankeit M, Olschewski M, Binder L, Geibel A et al. Heart-type fatty acid-binding protein permits early risk stratification of pulmonary embolism. *Eur Heart J* 2007;**28**:224–229.
- Kostrubiec M, Pruszczyk P, Bochowicz A, Pachó R, Szulc M, Kaczynska A et al. Biomarker-based risk assessment model in acute pulmonary embolism. *Eur Heart J* 2005;**26**:2166–2172.
- Kucher N, Wallmann D, Carone A, Windecker S, Meier B, Hess OM. Incremental prognostic value of troponin I and echocardiography in patients with acute pulmonary embolism. *Eur Heart J* 2003;**24**:1651–1656.
- Scridon T, Scridon C, Skali H, Alvarez A, Goldhaber SZ, Solomon SD. Prognostic significance of troponin elevation and right ventricular enlargement in acute pulmonary embolism. *Am J Cardiol* 2005;**96**:303–305.
